# Supplementary material for: Spatiotemporal Dynamics of DENV-2 Asian-American Genotype Lineages in the Americas
Source: PubMed Central journal article supplement (PMC4045713; doi:10.1371/journal.pone.0098519), 2014-06-04
Supplement: pone.0098519.s001.pdf [file pone.0098519.s001.pdf]

Table S1. Sequences

| GB accession number | Country | Year of isolation |
|---------------------|---------|-------------------|
| JF968045            | TH      | 2010              |
| EU448416            | TH      | 2006              |
| DQ181872            | TH      | 2000              |
| DQ181797            | TH      | 2001              |
| JQ815199            | CN      | 2009              |
| FJ744725            | TH      | 2001              |
| FJ744716            | TH      | 2001              |
| FJ744715            | TH      | 2001              |
| FJ744714            | TH      | 2001              |
| FJ687438            | TH      | 2001              |
| FJ687437            | TH      | 2001              |
| FJ639832            | TH      | 2001              |
| EU117352            | TH      | 2001              |
| EU117350            | TH      | 2001              |
| EU117341            | TH      | 2001              |
| EU117335            | TH      | 2001              |
| EU117330            | TH      | 2001              |
| EU117324            | TH      | 2001              |
| EU117318            | TH      | 2001              |
| JF967966            | KH      | 2008              |
| JF812111            | TH      | 2006              |
| JF812102            | TH      | 2003              |
| GU131924            | KH      | 2008              |
| GU131897            | KH      | 2007              |
| GQ868624            | KH      | 2007              |
| GQ868621            | KH      | 2003              |
| FJ898452            | TH      | 2003              |
| FJ639708            | KH      | 2005              |
| EU482661            | VN      | 2006              |
| DQ518646            | TH      | 2004              |
| JF968029            | TH      | 2010              |
| JF730045            | KH      | 2008              |
| GU211746            | VN      | 2004              |
| GU211745            | VN      | 2004              |
| GU131928            | KH      | 2008              |
| GU131900            | KH      | 2008              |
| FM210233            | VN      | 2004              |
| FJ744718            | TH      | 2001              |
| FJ744717            | TH      | 2001              |
| FJ639707            | KH      | 2004              |
| EU482775            | VN      | 2004              |
| EU117331            | TH      | 2001              |
| EU117326            | TH      | 2001              |
| EU117315            | TH      | 2001              |
| JF804027            | VN      | 1988              |
| GU131932            | KH      | 2008              |
| GU131901            | KH      | 2008              |
| GQ868625            | KH      | 2008              |
| GQ357789            | SG      | 2008              |
| FJ410221            | VN      | 2007              |
| EU482784            | VN      | 2003              |
| EU482782            | VN      | 2003              |
| EU482655            | VN      | 2006              |
| EU448415            | KH      | 2007              |

|          |    |      |
|----------|----|------|
| JN556046 | TH | 2003 |
| JQ403522 | TW | 2008 |
| JN544398 | SG | 2011 |
| JF968026 | MM | 2010 |
| JF967990 | TH | 2009 |
| JF967968 | VN | 2008 |
| JF730046 | KH | 2008 |
| GU908498 | VN | 2009 |
| GU434158 | VN | 2004 |
| GU434153 | VN | 2009 |
| GU211739 | VN | 2004 |
| GU131931 | KH | 2008 |
| GU131902 | KH | 2008 |
| GU131898 | KH | 2008 |
| FM210240 | VN | 2004 |
| FJ639718 | KH | 2008 |
| FJ639704 | KH | 2003 |
| FJ410215 | VN | 2008 |
| EU482786 | VN | 2003 |
| EU482677 | VN | 2006 |
| EU482647 | VN | 2006 |
| JF812112 | TH | 2006 |
| JX093643 | VN | 2011 |
| JF967987 | KH | 2009 |
| JF967986 | KH | 2009 |
| GU908510 | VN | 2009 |
| FM210242 | VN | 2004 |
| FM210231 | VN | 2004 |
| EU482774 | VN | 2004 |
| EU482642 | VN | 2006 |
| EU482472 | VN | 2004 |
| EU482468 | VN | 2006 |
| EU482451 | VN | 2006 |
| JF968033 | TH | 2010 |
| JF968030 | TH | 2010 |
| JF967989 | KH | 2009 |
| JF967988 | KH | 2009 |
| GU434148 | VN | 2007 |
| GQ868543 | TH | 1995 |
| FM210245 | VN | 2005 |
| FM210216 | VN | 2004 |
| FM210215 | VN | 2004 |
| FM210211 | VN | 2003 |
| FM210207 | VN | 2005 |
| FJ906957 | TH | 1996 |
| FJ410195 | VN | 2007 |
| EU482776 | VN | 2005 |
| EU482674 | VN | 2006 |
| EU482665 | VN | 2006 |
| EU482657 | VN | 2006 |
| EU482470 | VN | 2006 |
| EU482463 | VN | 2006 |
| JX093646 | VN | 2011 |
| JX093619 | VN | 2011 |
| JX093605 | VN | 2011 |
| JF968013 | TH | 2010 |

|          |    |      |
|----------|----|------|
| GU434147 | VN | 2007 |
| GU211738 | VN | 2004 |
| GQ868631 | KH | 2008 |
| FM210246 | VN | 2005 |
| FM210205 | VN | 2005 |
| FJ744713 | TH | 2001 |
| FJ687439 | TH | 2001 |
| FJ639711 | KH | 2005 |
| FJ639710 | KH | 2005 |
| FJ410224 | VN | 2007 |
| EU726776 | VN | 2007 |
| EU687250 | VN | 2007 |
| EU687248 | VN | 2007 |
| EU660417 | VN | 2007 |
| EU482675 | VN | 2006 |
| EU482658 | VN | 2006 |
| EU482447 | VN | 2006 |
| EU117351 | TH | 2001 |
| EU117339 | TH | 2001 |
| DQ518645 | TW | 1998 |
| DQ181866 | TH | 1996 |
| JF968052 | VN | 2010 |
| JN376791 | VN | 2008 |
| JF812113 | TH | 2006 |
| GU131886 | TH | 2001 |
| FJ810412 | TH | 2001 |
| FJ810411 | TH | 2001 |
| FJ744724 | TH | 2001 |
| FJ744712 | TH | 2001 |
| FJ744711 | TH | 2001 |
| FJ744710 | TH | 2001 |
| FJ687447 | TH | 2001 |
| FJ410208 | VN | 2007 |
| FJ205877 | VN | 2007 |
| FJ024461 | VN | 2007 |
| FJ024458 | VN | 2007 |
| FJ024452 | VN | 2007 |
| EU687249 | VN | 2007 |
| EU677149 | VN | 2007 |
| EU660416 | VN | 2007 |
| EU660415 | VN | 2007 |
| EU482678 | VN | 2006 |
| EU482663 | VN | 2006 |
| EU482659 | VN | 2006 |
| EU482649 | VN | 2006 |
| EU482643 | VN | 2006 |
| EU482448 | VN | 2006 |
| EU482446 | VN | 2006 |
| EU482445 | VN | 2006 |
| EU448417 | VN | 2007 |
| EU117345 | TH | 2001 |
| EU117340 | TH | 2001 |
| EU117334 | TH | 2001 |
| EU117327 | TH | 2001 |
| EU117325 | TH | 2001 |
| EU117323 | TH | 2001 |

|          |    |      |
|----------|----|------|
| EU117317 | TH | 2001 |
| DQ181900 | TH | 1997 |
| DQ181849 | TH | 1995 |
| JX101615 | VN | 2011 |
| JX093617 | VN | 2011 |
| JX093614 | VN | 2011 |
| JN376793 | VN | 2010 |
| JN376789 | VN | 2006 |
| JF968021 | LA | 2010 |
| JF968020 | LA | 2010 |
| GU908505 | VN | 2009 |
| GU908500 | VN | 2008 |
| FM210206 | VN | 2005 |
| FJ873811 | VN | 2006 |
| FJ461311 | VN | 2008 |
| FJ432724 | VN | 2007 |
| FJ410288 | VN | 2007 |
| FJ410233 | VN | 2008 |
| FJ410217 | VN | 2007 |
| FJ410200 | VN | 2007 |
| FJ410193 | VN | 2007 |
| EU660414 | VN | 2007 |
| EU569721 | VN | 2006 |
| EU482777 | VN | 2005 |
| EU482703 | VN | 2007 |
| EU482676 | VN | 2006 |
| EU482653 | VN | 2006 |
| EU482541 | VN | 2006 |
| EU482466 | VN | 2006 |
| EU482464 | VN | 2006 |
| DQ518647 | VN | 2005 |
| DQ181868 | TH | 1996 |
| JX093638 | VN | 2011 |
| JX093632 | VN | 2011 |
| JX093600 | VN | 2011 |
| JX093596 | VN | 2011 |
| JX093595 | VN | 2011 |
| JN376794 | VN | 2011 |
| JF967984 | VN | 2009 |
| HM134238 | TH | 1999 |
| GU908499 | VN | 2008 |
| GU131899 | KH | 2008 |
| FJ461321 | VN | 2007 |
| FJ432726 | VN | 2007 |
| FJ410202 | VN | 2007 |
| FJ390385 | VN | 2007 |
| FJ373299 | VN | 2007 |
| EU482705 | VN | 2007 |
| EU482704 | VN | 2007 |
| EU482669 | VN | 2006 |
| EU482668 | VN | 2006 |
| EU482656 | VN | 2006 |
| EU482651 | VN | 2006 |
| EU482646 | VN | 2006 |
| EU482641 | VN | 2006 |
| EU482543 | VN | 2006 |

|          |    |      |
|----------|----|------|
| EU482465 | VN | 2006 |
| EU482450 | VN | 2006 |
| DQ181871 | TH | 2001 |
| DQ181841 | TH | 1991 |
| JX093651 | VN | 2011 |
| JX093633 | VN | 2011 |
| JX093631 | VN | 2011 |
| JX093630 | VN | 2011 |
| JX093621 | VN | 2011 |
| JX093615 | VN | 2011 |
| JX093611 | VN | 2011 |
| JX093603 | VN | 2011 |
| JX093593 | VN | 2011 |
| JX093591 | VN | 2011 |
| GU908506 | VN | 2009 |
| GU908503 | VN | 2008 |
| GU908502 | VN | 2008 |
| GU908501 | VN | 2008 |
| GU434146 | VN | 2007 |
| FJ410228 | VN | 2007 |
| FJ410223 | VN | 2007 |
| FJ390384 | VN | 2007 |
| FJ205879 | VN | 2007 |
| FJ205878 | VN | 2007 |
| EU660413 | VN | 2007 |
| EU482702 | VN | 2007 |
| EU482699 | VN | 2007 |
| EU482698 | VN | 2007 |
| EU482697 | VN | 2007 |
| EU482671 | VN | 2006 |
| EU482652 | VN | 2006 |
| EU482650 | VN | 2006 |
| EU482474 | VN | 2007 |
| EU482473 | VN | 2006 |
| EU482467 | VN | 2006 |
| DQ518648 | VN | 2005 |
| JX093642 | VN | 2011 |
| JX093641 | VN | 2011 |
| JX093634 | VN | 2011 |
| JX093623 | VN | 2011 |
| JX093607 | VN | 2011 |
| JQ896293 | IE | 2010 |
| JN376790 | VN | 2007 |
| JF968018 | TH | 2010 |
| JF967993 | VN | 2009 |
| GU908497 | VN | 2009 |
| GU908494 | VN | 2009 |
| GU434152 | VN | 2009 |
| GU434149 | VN | 2008 |
| FJ859028 | VN | 2007 |
| FJ562098 | VN | 2007 |
| FJ205880 | VN | 2007 |
| EU677148 | VN | 2007 |
| EU677138 | VN | 2007 |
| EU677137 | VN | 2007 |
| EU482701 | VN | 2007 |

|          |    |      |
|----------|----|------|
| EU482700 | VN | 2007 |
| EU482679 | VN | 2007 |
| EU482667 | VN | 2006 |
| EU482644 | VN | 2006 |
| EU482475 | VN | 2007 |
| EU482471 | VN | 2006 |
| DQ181894 | TH | 2000 |
| JX093653 | VN | 2011 |
| JX093652 | VN | 2011 |
| JX093648 | VN | 2011 |
| JX093645 | VN | 2011 |
| JX093637 | VN | 2011 |
| JX093629 | VN | 2011 |
| JX093628 | VN | 2011 |
| JX093625 | VN | 2011 |
| JX093624 | VN | 2011 |
| JX093620 | VN | 2011 |
| JX093612 | VN | 2011 |
| JX093608 | VN | 2011 |
| JX093602 | VN | 2011 |
| JX093599 | VN | 2011 |
| JX093590 | VN | 2011 |
| JX093589 | VN | 2011 |
| JX093587 | VN | 2011 |
| JQ403523 | TW | 2009 |
| JF968041 | TH | 2010 |
| JF968027 | VN | 2010 |
| JF968019 | VN | 2010 |
| JF968017 | TH | 2010 |
| JF967978 | VN | 2009 |
| GU908511 | VN | 2009 |
| GU908508 | VN | 2009 |
| GU908507 | VN | 2009 |
| GU908495 | VN | 2009 |
| GU131927 | KH | 2007 |
| GQ868620 | KH | 2003 |
| FJ547067 | VN | 2007 |
| FJ547064 | VN | 2007 |
| FJ410241 | VN | 2008 |
| FJ410237 | VN | 2008 |
| EU482673 | VN | 2006 |
| EU482645 | VN | 2006 |
| EU482469 | VN | 2006 |
| JX093647 | VN | 2011 |
| JX093644 | VN | 2011 |
| JX093639 | VN | 2011 |
| JX093636 | VN | 2011 |
| JX093606 | VN | 2011 |
| JX093601 | VN | 2011 |
| JX093586 | VN | 2011 |
| JF968048 | VN | 2010 |
| JF967961 | VN | 2008 |
| GU908504 | VN | 2008 |
| GU434150 | VN | 2008 |
| FJ461314 | VN | 2007 |
| FJ024454 | VN | 2007 |

|          |    |      |
|----------|----|------|
| DQ181889 | TH | 2001 |
| DQ181873 | TH | 2000 |
| DQ181859 | TH | 1992 |
| DQ181845 | TH | 1990 |
| DQ181842 | TH | 1991 |
| JX093649 | VN | 2011 |
| JX093640 | VN | 2011 |
| JX093635 | VN | 2011 |
| JX093592 | VN | 2011 |
| JX093588 | VN | 2011 |
| JX093585 | VN | 2011 |
| JF968042 | TH | 2010 |
| JF967999 | VN | 2009 |
| JF730049 | VN | 2007 |
| FM210214 | VN | 2004 |
| FJ687443 | TH | 2001 |
| FJ687442 | TH | 2001 |
| FJ687441 | TH | 2001 |
| FJ687440 | TH | 2001 |
| FJ461305 | VN | 2007 |
| EU117329 | TH | 2001 |
| EU117316 | TH | 2001 |
| EU117314 | TH | 2001 |
| EU117313 | TH | 2001 |
| DQ181832 | TH | 1985 |
| JX093626 | VN | 2011 |
| JX093613 | VN | 2011 |
| JX093610 | VN | 2011 |
| JX093604 | VN | 2011 |
| JX093598 | VN | 2011 |
| FJ810409 | TH | 2001 |
| FJ410259 | VN | 2008 |
| EU482670 | VN | 2006 |
| EU482654 | VN | 2006 |
| EU482542 | VN | 2006 |
| EU117349 | TH | 2001 |
| DQ181844 | TH | 1990 |
| JX093597 | VN | 2011 |
| JN376792 | VN | 2009 |
| FJ639706 | KH | 2004 |
| DQ181848 | TH | 1987 |
| DQ181843 | TH | 1990 |
| DQ181829 | TH | 1987 |
| JX093622 | VN | 2011 |
| GQ868623 | KH | 2005 |
| FJ639709 | KH | 2005 |
| DQ518649 | KH | 2003 |
| DQ181885 | TH | 1993 |
| DQ181883 | TH | 1994 |
| DQ181870 | TH | 1995 |
| DQ181847 | TH | 1988 |
| DQ181802 | TH | 1988 |
| DQ518650 | VN | 2004 |
| DQ181886 | TH | 1993 |
| DQ181880 | TH | 1995 |
| DQ181857 | TH | 1993 |

|          |    |      |
|----------|----|------|
| DQ181854 | TH | 1993 |
| DQ181851 | TH | 1994 |
| DQ181840 | TH | 1991 |
| DQ181839 | TH | 1991 |
| DQ181834 | TH | 1984 |
| DQ181831 | TH | 1986 |
| DQ181800 | TH | 1995 |
| GQ868544 | TH | 1996 |
| FJ461309 | VN | 2008 |
| DQ181899 | TH | 1997 |
| DQ181888 | TH | 1990 |
| DQ181882 | TH | 1994 |
| DQ181881 | TH | 1995 |
| DQ181855 | TH | 1993 |
| DQ181853 | TH | 1994 |
| DQ181837 | TH | 1983 |
| DQ181830 | TH | 1986 |
| JF967994 | VN | 2009 |
| GU908520 | VN | 2008 |
| GU908518 | VN | 2008 |
| GU908517 | VN | 2008 |
| GU908516 | VN | 2008 |
| GU908509 | VN | 2009 |
| EU687246 | TH | 1994 |
| DQ181901 | TH | 1996 |
| DQ181897 | TH | 1998 |
| DQ181835 | TH | 1984 |
| DQ181803 | TH | 1985 |
| JX093616 | VN | 2011 |
| JN368476 | KH | 2007 |
| GU908519 | VN | 2008 |
| GU908513 | VN | 2008 |
| GU908512 | VN | 2008 |
| GU131896 | KH | 2007 |
| GQ868638 | KH | 2008 |
| FJ906958 | TH | 1996 |
| FJ810410 | TH | 2001 |
| FJ687446 | TH | 2001 |
| FJ687445 | TH | 2001 |
| FJ639829 | TH | 2001 |
| FJ639717 | KH | 2007 |
| FJ639705 | KH | 2003 |
| EU117348 | TH | 2001 |
| EU117322 | TH | 2001 |
| EU117320 | TH | 2001 |
| EU117319 | TH | 2001 |
| DQ181891 | TH | 2000 |
| DQ181852 | TH | 1994 |
| DQ181850 | TH | 1994 |
| JX093618 | VN | 2011 |
| JX093654 | VN | 2011 |
| JX093627 | VN | 2011 |
| GU908515 | VN | 2008 |
| GU908514 | VN | 2008 |
| GQ868542 | TH | 1994 |
| FJ744721 | TH | 2001 |

|          |    |      |
|----------|----|------|
| FJ687444 | TH | 2001 |
| FJ639830 | TH | 2001 |
| EU117347 | TH | 2001 |
| EU117321 | TH | 2001 |
| DQ181887 | TH | 1990 |
| DQ181884 | TH | 1993 |
| DQ181875 | TH | 1999 |
| DQ181865 | TH | 1996 |
| DQ181861 | TH | 1998 |
| DQ181858 | TH | 1992 |
| DQ181856 | TH | 1993 |
| DQ181827 | TH | 1980 |
| GQ868622 | KH | 2003 |
| FJ744723 | TH | 2001 |
| FJ744720 | TH | 2001 |
| FJ744719 | TH | 2001 |
| FJ639828 | TH | 2001 |
| EU117346 | TH | 2001 |
| EU117338 | TH | 2001 |
| EU117337 | TH | 2001 |
| EU117332 | TH | 2001 |
| EU117328 | TH | 2001 |
| DQ181893 | TH | 2000 |
| DQ181892 | TH | 2000 |
| DQ181876 | TH | 1999 |
| DQ181867 | TH | 1996 |
| JF730047 | KH | 2008 |
| GU131930 | KH | 2008 |
| DQ181879 | TH | 1996 |
| DQ181869 | TH | 1995 |
| DQ181860 | TH | 1998 |
| JX093650 | VN | 2011 |
| JF730048 | KH | 2008 |
| FJ744722 | TH | 2001 |
| FJ687436 | TH | 2001 |
| FJ687435 | TH | 2001 |
| FJ687434 | TH | 2001 |
| EU117344 | TH | 2001 |
| EU117343 | TH | 2001 |
| EU117342 | TH | 2001 |
| EU117336 | TH | 2001 |
| DQ181878 | TH | 1998 |
| DQ181864 | TH | 1997 |
| DQ181863 | TH | 1997 |
| GQ868545 | TH | 1996 |
| FJ639831 | TH | 2001 |
| EU117333 | TH | 2001 |
| DQ518651 | MM | 2002 |
| DQ181862 | TH | 1997 |
| DQ181826 | TH | 1980 |
| EU726767 | TH | 1994 |
| DQ181896 | TH | 1999 |
| DQ181828 | TH | 1980 |
| DQ181821 | TH | 1982 |
| DQ181805 | TH | 1979 |
| DQ181895 | TH | 1999 |

|          |    |      |
|----------|----|------|
| DQ181833 | TH | 1985 |
| DQ181809 | TH | 1979 |
| DQ181817 | TH | 1983 |
| DQ181798 | TH | 1999 |
| DQ181890 | TH | 2001 |
| DQ181877 | TH | 1999 |
| DQ181823 | TH | 1981 |
| DQ181804 | TH | 1984 |
| DQ518652 | MM | 2004 |
| DQ181874 | TH | 2000 |
| DQ181824 | TH | 1981 |
| DQ181819 | TH | 1982 |
| DQ181838 | TH | 1983 |
| FJ196851 | CN | 1998 |
| DQ181822 | TH | 1982 |
| JF812114 | TH | 2001 |
| DQ518653 | MM | 2004 |
| DQ181814 | TH | 1976 |
| DQ181811 | TH | 1978 |
| DQ181815 | TH | 1976 |
| DQ181808 | TH | 1979 |
| DQ181816 | TH | 1974 |
| DQ181836 | TH | 1984 |
| DQ181825 | TH | 1981 |
| DQ181813 | TH | 1977 |
| DQ181812 | TH | 1977 |
| GU289914 | TH | 1974 |
| DQ181806 | TH | 1974 |
| DQ181807 | TH | 1980 |
| DQ181810 | TH | 1978 |
| GQ868591 | TH | 1964 |
| GQ398268 | ID | 1975 |
| JF730053 | US | 2006 |
| JF730050 | US | 2007 |
| JF730055 | US | 2009 |
| JF730054 | US | 2009 |
| HQ541798 | US | 2009 |
| HQ541799 | US | 2010 |
| HQ891023 | TW | 2008 |
| EU854293 | CO | 1944 |
| FJ390389 | CO | 1944 |
| JN796245 | CA | 2008 |
| JF804032 | GU | 2001 |
| FJ906959 | PG | 2008 |
| HQ891024 | TW | 2008 |
| DQ181820 | TH | 1982 |
| DQ181818 | TH | 1983 |
| JN819418 | VN | 1988 |
| GU211758 | VN | 2006 |
| GQ398258 | ID | 1975 |
| GU211754 | VN | 2006 |
| GU211750 | VN | 2006 |
| GQ398299 | PR | 1994 |
| DQ518638 | MM | 1998 |
| FJ538920 | IN | 1974 |
| GQ398302 | PR | 1994 |

|          |    |      |
|----------|----|------|
| GQ398298 | PR | 1995 |
| EU482747 | PR | 1988 |
| EU482741 | PR | 1994 |
| EU482585 | PR | 1989 |
| EU482579 | PR | 1988 |
| EU482578 | PR | 1988 |
| EU482575 | PR | 1987 |
| EU482569 | PR | 1987 |
| GQ398300 | PR | 1994 |
| GQ398264 | ID | 1976 |
| JF804038 | TT | 1997 |
| GU211763 | VN | 2006 |
| GU211762 | VN | 2006 |
| GU211760 | VN | 2006 |
| GU211757 | VN | 2006 |
| GU211752 | VN | 2006 |
| GU211749 | VN | 2006 |
| GU211747 | VN | 2006 |
| GQ398307 | PR | 1994 |
| GQ398306 | PR | 1994 |
| GQ398303 | PR | 1994 |
| GQ398301 | PR | 1995 |
| EU660399 | PR | 1995 |
| EU569705 | PR | 1993 |
| EU569704 | PR | 1986 |
| EU482743 | PR | 1989 |
| EU482742 | PR | 1988 |
| EU482737 | PR | 1994 |
| EU482736 | PR | 1994 |
| EU482588 | PR | 1990 |
| EU482586 | PR | 1990 |
| EU482582 | PR | 1989 |
| EU482581 | PR | 1989 |
| EU482577 | PR | 1987 |
| EU482576 | PR | 1987 |
| DQ181801 | TH | 1990 |
| GQ398261 | ID | 1976 |
| GQ398259 | ID | 1976 |
| FJ538923 | IN | 1991 |
| GU211761 | VN | 2006 |
| GU211759 | VN | 2006 |
| GU211756 | VN | 2006 |
| GU211751 | VN | 2006 |
| GQ398313 | PR | 1994 |
| GQ398312 | PR | 1994 |
| GQ398311 | PR | 1994 |
| GQ398309 | PR | 1994 |
| GQ398305 | PR | 1994 |
| GQ398304 | PR | 1994 |
| GQ398296 | PR | 1994 |
| GQ398295 | PR | 1994 |
| GQ398292 | PR | 1994 |
| GQ398282 | PR | 1994 |
| GQ398273 | PR | 1994 |
| GQ398270 | PR | 1994 |
| GQ398262 | ID | 1976 |

|          |    |        |      |
|----------|----|--------|------|
| EU529700 | PR |        | 1994 |
| EU529694 | PR |        | 1994 |
| EU482746 | PR |        | 1989 |
| EU482744 | PR |        | 1989 |
| EU482739 | PR |        | 1994 |
| EU482584 | PR |        | 1989 |
| EU482583 | PR |        | 1989 |
| EU482574 | PR |        | 1987 |
| EU482573 | PR |        | 1987 |
| EU482570 | PR |        | 1987 |
| EU482568 | PR |        | 1986 |
| EU482562 | PR |        | 1989 |
| EU482561 | PR |        | 1996 |
| GQ398294 | PR |        | 1994 |
| FJ538922 | IN |        | 1983 |
| JN376785 | VN |        | 2002 |
| GU211755 | VN |        | 2006 |
| GQ868603 | VI |        | 1987 |
| GQ398310 | PR |        | 1994 |
| GQ398308 | PR |        | 1994 |
| GQ398297 | PR |        | 1994 |
| GQ398289 | PR |        | 1994 |
| GQ398283 | PR |        | 1994 |
| GQ398276 | PR |        | 1994 |
| GQ398275 | PR |        | 1994 |
| GQ398272 | PR |        | 1994 |
| EU660398 | PR |        | 1989 |
| EU482745 | PR |        | 1989 |
| EU482594 | PR |        | 1992 |
| EU482590 | PR |        | 1990 |
| EU482571 | PR |        | 1987 |
| GQ398263 | ID |        | 1975 |
| GQ398260 | ID |        | 1976 |
| GU434156 | VN |        | 2003 |
| GU434155 | VN |        | 2002 |
| GU434154 | VN |        | 2001 |
| GU211748 | VN |        | 2006 |
| GQ868541 | VE | Aragua | 1991 |
| GQ398293 | PR |        | 1994 |
| GQ398291 | PR |        | 1994 |
| GQ398290 | PR |        | 1994 |
| GQ398288 | PR |        | 1994 |
| GQ398287 | PR |        | 1994 |
| GQ398286 | PR |        | 1994 |
| GQ398281 | PR |        | 1994 |
| GQ398280 | PR |        | 1994 |
| GQ398279 | PR |        | 1994 |
| GQ398274 | PR |        | 1994 |
| GQ398271 | PR |        | 1994 |
| FM210244 | VN |        | 2004 |
| EU569708 | PR |        | 1995 |
| EU569706 | PR |        | 1995 |
| EU529701 | PR |        | 1991 |
| EU482733 | PR |        | 1998 |
| EU482727 | PR |        | 1998 |
| DQ181846 | TH |        | 1988 |

|          |    |           |      |
|----------|----|-----------|------|
| JX093594 | VN |           | 2011 |
| HM234642 | BF |           | 1986 |
| EU056810 | BF |           | 1983 |
| GU434159 | VN |           | 2004 |
| GQ398314 | PR |           | 1994 |
| GQ398285 | PR |           | 1994 |
| GQ398278 | PR |           | 1994 |
| GQ398277 | PR |           | 1994 |
| FM210243 | VN |           | 2004 |
| FM210238 | VN |           | 2001 |
| FM210226 | VN |           | 2002 |
| FJ898450 | VI |           | 1990 |
| FJ538911 | IN |           | 1993 |
| EU569707 | PR |           | 1995 |
| EU529695 | PR |           | 1994 |
| EU482740 | PR |           | 1994 |
| EU482738 | PR |           | 1998 |
| EU482721 | PR |           | 2006 |
| EU482589 | PR |           | 1993 |
| EU482587 | PR |           | 1990 |
| EU482580 | PR |           | 1989 |
| AM746224 | SA |           | 1994 |
| AM746223 | SA |           | 1994 |
| AB479042 | VN |           | 2002 |
| AB479041 | VN |           | 2002 |
| JF968039 | PH |           | 2010 |
| JF957000 | CN |           | 2010 |
| EF016253 | TW |           | 2002 |
| JN376787 | VN |           | 2004 |
| GQ868552 | CO | Santander | 1998 |
| FM210228 | VN |           | 2003 |
| FM210217 | VN |           | 1999 |
| FM210202 | VN |           | 2004 |
| FJ538925 | IN |           | 1992 |
| EU660400 | PR |           | 1998 |
| EU596487 | PR |           | 1998 |
| EU569717 | PR |           | 1997 |
| EU569715 | PR |           | 1997 |
| EU569712 | PR |           | 1998 |
| EU569709 | PR |           | 1996 |
| EU569703 | PR |           | 1996 |
| EU482735 | PR |           | 1998 |
| EU482734 | PR |           | 1998 |
| EU482729 | PR |           | 1999 |
| EU482572 | PR |           | 1987 |
| EU482550 | PR |           | 1998 |
| DQ518641 | VN |           | 2003 |
| DQ518630 | TW |           | 2001 |
| GQ398269 | PR |           | 1994 |
| JF968001 | PH |           | 2009 |
| GU131843 | BF |           | 1986 |
| EF016252 | TW |           | 2002 |
| EF016251 | TW |           | 2002 |
| EF016250 | TW |           | 2002 |
| GU211753 | VN |           | 2006 |
| GQ868598 | VE |           | 1991 |

Sheet1

|          |    |           |      |      |
|----------|----|-----------|------|------|
| GQ868597 | VE |           | 1991 |      |
| GQ868596 | VE |           | 1991 |      |
| GQ868595 | VE |           | 1991 |      |
| GQ868540 | VE | Maracay   |      | 1990 |
| GQ398284 | PR |           | 1994 |      |
| FM210234 | VN |           | 2004 |      |
| FM210230 | VN |           | 2003 |      |
| FM210218 | VN |           | 2002 |      |
| FJ639697 | KH |           | 2001 |      |
| EU596485 | PR |           | 1996 |      |
| EU569716 | PR |           | 1997 |      |
| EU569714 | PR |           | 1997 |      |
| EU569711 | PR |           | 1998 |      |
| EU529706 | PR |           | 2006 |      |
| EU482732 | PR |           | 1998 |      |
| EU482664 | VN |           | 2006 |      |
| EU482565 | PR |           | 1998 |      |
| AM746227 | SA |           | 1994 |      |
| AM746225 | SA |           | 1994 |      |
| JN851131 | SG |           | 2005 |      |
| JN819416 | NI |           | 2000 |      |
| JF967955 | PH |           | 2008 |      |
| GQ199898 | NI |           |      | 2001 |
| GQ199895 | NI |           | 1999 |      |
| GQ199894 | MX |           | 2005 |      |
| FJ873808 | NI |           | 2000 |      |
| FJ850060 | NI |           | 2000 |      |
| EU482634 | NI |           | 2006 |      |
| DQ518631 | PH |           | 2005 |      |
| JF730044 | KH |           | 2001 |      |
| GQ868553 | CO | Santander |      | 1999 |
| FM210229 | VN |           | 2003 |      |
| FM210223 | VN |           | 2003 |      |
| FM210219 | VN |           | 2003 |      |
| FM210212 | VN |           | 2003 |      |
| FM210208 | VN |           | 2003 |      |
| FM210203 | VN |           | 2003 |      |
| FJ898465 | VE | Aragua    |      | 1998 |
| EU726775 | VE | Aragua    |      | 1996 |
| EU687225 | PR |           | 2000 |      |
| EU687222 | PR |           | 2000 |      |
| EU687220 | VE | Aragua    |      | 1996 |
| EU677141 | PR |           | 1996 |      |
| EU596486 | PR |           | 1996 |      |
| EU569719 | PR |           | 1997 |      |
| EU569718 | PR |           | 1997 |      |
| EU569710 | PR |           | 1996 |      |
| EU482779 | VN |           | 2003 |      |
| EU482778 | VN |           | 2003 |      |
| EU482730 | PR |           | 1999 |      |
| EU482728 | PR |           | 1998 |      |
| EU482557 | PR |           | 1999 |      |
| EU482545 | PR |           | 1998 |      |
| L10045   | PH |           | 1983 |      |
| JF968037 | PH |           | 2010 |      |
| JF967971 | PH |           | 2008 |      |

|          |    |           |      |
|----------|----|-----------|------|
| GQ868497 | MX |           | 2006 |
| FJ850119 | NI |           | 2000 |
| FJ850118 | NI |           | 2000 |
| FJ850117 | NI |           | 2000 |
| FJ850054 | NI |           | 2005 |
| FJ226066 | NI |           | 2005 |
| EU482761 | NI |           | 2005 |
| EU482754 | NI |           | 2005 |
| EU482748 | NI |           | 2005 |
| EU482695 | NI |           | 2005 |
| EU482681 | NI |           | 2005 |
| EU482680 | NI |           | 2005 |
| EU482631 | NI |           | 2005 |
| EU482602 | NI |           | 2005 |
| EU482599 | NI |           | 2005 |
| EU482598 | NI |           | 2005 |
| JF967956 | ID |           | 2008 |
| FM210239 | VN |           | 2004 |
| FM210232 | VN |           | 2004 |
| FM210225 | VN |           | 2001 |
| FM210224 | VN |           | 2001 |
| FM210222 | VN |           | 2004 |
| FM210220 | VN |           | 2003 |
| FM210213 | VN |           | 2005 |
| FM210210 | VN |           | 2003 |
| FM210204 | VN |           | 2003 |
| FJ898460 | KN |           | 2001 |
| FJ882602 | LK |           | 1996 |
| FJ639698 | KH |           | 2002 |
| FJ538912 | IN |           | 1995 |
| FJ024477 | CO | Antioquia | 2004 |
| EU687232 | PR |           | 2001 |
| EU687227 | PR |           | 2001 |
| EU687224 | PR |           | 2000 |
| EU687223 | PR |           | 2000 |
| EU687215 | PR |           | 2004 |
| EU687213 | PR |           | 2004 |
| EU677144 | PR |           | 1999 |
| EU677143 | PR |           | 1999 |
| EU569720 | PR |           | 1997 |
| EU569713 | PR |           | 1997 |
| EU529693 | PR |           | 2004 |
| EU482788 | VN |           | 2003 |
| EU482783 | VN |           | 2003 |
| EU482781 | VN |           | 2003 |
| EU482722 | PR |           | 2002 |
| EU482554 | PR |           | 1998 |
| EU482547 | PR |           | 1998 |
| DQ518640 | TW |           | 2005 |
| JN030343 | SG |           | 2010 |
| JF968047 | PH |           | 2010 |
| JF968036 | PH |           | 2010 |
| JF968011 | PH |           | 2010 |
| JF804029 | CO |           | 2007 |
| GU586492 | GT |           | 2007 |
| GQ199897 | NI |           | 2002 |

|          |    |        |      |      |
|----------|----|--------|------|------|
| GQ199893 | MX |        | 2002 |      |
| GQ199874 | NI |        | 2004 |      |
| FJ906961 | NI |        | 2005 |      |
| FJ898478 | NI |        | 2000 |      |
| FJ898436 | NI |        | 2004 |      |
| FJ882594 | NI |        | 2007 |      |
| FJ850066 | NI |        | 2000 |      |
| FJ850063 | NI |        | 2000 |      |
| FJ850062 | NI |        | 2000 |      |
| FJ850053 | NI |        | 2005 |      |
| FJ744705 | NI |        | 2000 |      |
| FJ196852 | CN |        | 2001 |      |
| EU482757 | NI |        | 2005 |      |
| EU482755 | NI |        | 2005 |      |
| EU482689 | NI |        | 2006 |      |
| EU482444 | NI |        | 2006 |      |
| EF051521 | CN |        | 2001 |      |
| JN030344 | SG |        | 2010 |      |
| GU211744 | VN |        | 2003 |      |
| FJ639788 | VE | Aragua |      | 2004 |
| FJ639783 | VE | Aragua |      | 2003 |
| FJ639703 | KH |        | 2003 |      |
| FJ639701 | KH |        | 2002 |      |
| FJ639699 | KH |        | 2002 |      |
| FJ538924 | IN |        | 1990 |      |
| EU726770 | PR |        | 2005 |      |
| EU687244 | PR |        | 2004 |      |
| EU687243 | PR |        | 2004 |      |
| EU687242 | PR |        | 2004 |      |
| EU687240 | PR |        | 2003 |      |
| EU687237 | PR |        | 2003 |      |
| EU687231 | PR |        | 2001 |      |
| EU687229 | PR |        | 2001 |      |
| EU687228 | PR |        | 2001 |      |
| EU687212 | PR |        | 1998 |      |
| EU687199 | PR |        | 2003 |      |
| EU677147 | PR |        | 2004 |      |
| EU482787 | VN |        | 2003 |      |
| EU482785 | VN |        | 2003 |      |
| EU482780 | VN |        | 2003 |      |
| EU482724 | PR |        | 2005 |      |
| EU448421 | IN |        | 2006 |      |
| JN380838 | SG |        | 2009 |      |
| JF967998 | PH |        | 2009 |      |
| JF967997 | PH |        | 2009 |      |
| JF967995 | PH |        | 2009 |      |
| JF967991 | PH |        | 2009 |      |
| JF967983 | PH |        | 2009 |      |
| JF327392 | SG |        | 2009 |      |
| HQ541793 | NI |        | 2005 |      |
| HM631868 | NI |        | 2005 |      |
| FM986656 | MY |        | 1999 |      |
| FJ937969 | MX |        | 2005 |      |
| FJ937968 | MX |        | 2005 |      |
| FJ906956 | NI |        | 2005 |      |
| FJ898477 | NI |        | 2000 |      |

Sheet1

|          |    |        |      |      |
|----------|----|--------|------|------|
| FJ850121 | NI |        | 2001 |      |
| FJ850120 | NI |        | 2001 |      |
| FJ850067 | NI |        | 2006 |      |
| FJ850065 | NI |        | 2000 |      |
| FJ850064 | NI |        | 2000 |      |
| FJ850061 | NI |        |      | 2000 |
| FJ744741 | NI |        | 2006 |      |
| EU482771 | NI |        | 2005 |      |
| EU482763 | NI |        | 2005 |      |
| EU482760 | NI |        | 2005 |      |
| EU482759 | NI |        | 2005 |      |
| EU482756 | NI |        | 2005 |      |
| EU482752 | NI |        | 2005 |      |
| EU482639 | NI |        | 2006 |      |
| EU482629 | NI |        | 2007 |      |
| EU482603 | NI |        | 2007 |      |
| EF540856 | TW |        | 1981 |      |
| DQ518632 | PH |        | 2001 |      |
| AM746226 | SA |        | 1994 |      |
| JN819408 | VE | Aragua |      | 2001 |
| JF967972 | ID |        | 2008 |      |
| JF804031 | DO |        | 2003 |      |
| GU434157 | VN |        | 2004 |      |
| GU211742 | VN |        | 2003 |      |
| GU211741 | VN |        | 2003 |      |
| GU211740 | VN |        | 2004 |      |
| FM210237 | VN |        | 2003 |      |
| FM210235 | VN |        | 2005 |      |
| FM210227 | VN |        | 2002 |      |
| FM210209 | VN |        | 2003 |      |
| FJ898451 | DO |        | 2003 |      |
| FJ639702 | KH |        | 2003 |      |
| EU687241 | PR |        | 2003 |      |
| EU687238 | PR |        | 2003 |      |
| EU687236 | PR |        | 2003 |      |
| EU687235 | PR |        | 2003 |      |
| EU687230 | PR |        | 2001 |      |
| EU687214 | PR |        | 2004 |      |
| EU596489 | PR |        | 2007 |      |
| EU482731 | PR |        | 2005 |      |
| EU482725 | PR |        | 2006 |      |
| EU482560 | PR |        | 1998 |      |
| EU482553 | PR |        | 2006 |      |
| EU482544 | PR |        | 2006 |      |
| EU448419 | KH |        | 2004 |      |
| JF968005 | MY |        | 2010 |      |
| JF804035 | MX |        | 2002 |      |
| HQ541801 | NI |        | 2005 |      |
| HQ541794 | NI |        | 2005 |      |
| GU131975 | MX |        | 2007 |      |
| GU131959 | MX |        | 2006 |      |
| GU131955 | MX |        | 2004 |      |
| FM986661 | MY |        | 2002 |      |
| FM986658 | MY |        | 2002 |      |
| FJ898438 | MX |        | 2002 |      |
| FJ898435 | NI |        | 2005 |      |

|          |    |        |      |      |
|----------|----|--------|------|------|
| FJ850115 | NI |        | 2005 |      |
| EU596484 | NI |        | 2005 |      |
| EU482770 | NI |        | 2005 |      |
| EU482769 | NI |        | 2005 |      |
| EU482758 | NI |        | 2005 |      |
| EU482753 | NI |        | 2005 |      |
| EU482750 | NI |        | 2005 |      |
| EU482749 | NI |        | 2005 |      |
| EU482696 | NI |        | 2006 |      |
| EU482637 | NI |        | 2005 |      |
| EU482636 | NI |        | 2005 |      |
| EU482635 | NI |        | 2005 |      |
| EU482633 | NI |        | 2006 |      |
| EU482632 | NI |        | 2005 |      |
| EU482600 | NI |        | 2005 |      |
| EU482597 | NI |        | 2005 |      |
| JN376786 | VN |        | 2003 |      |
| JF968040 | IN |        | 2010 |      |
| JF967973 | ID |        | 2009 |      |
| JF967969 | ID |        | 2008 |      |
| JF804037 | VI |        | 2005 |      |
| FM210236 | VN |        | 2004 |      |
| FJ898466 | VE | Aragua |      | 2000 |
| FJ898453 | VI |        | 2005 |      |
| FJ639822 | VE | Aragua |      | 2006 |
| FJ639700 | KH |        | 2002 |      |
| EU677145 | PR |        | 1999 |      |
| EU677142 | PR |        | 1999 |      |
| EU482593 | PR |        | 2001 |      |
| EU045311 | PY |        | 2001 |      |
| DQ448232 | IN |        | 2001 |      |
| JX079692 | NI |        | 2007 |      |
| JN819422 | MX |        | 2008 |      |
| JF968038 | PH |        | 2010 |      |
| JF968004 | PH |        | 2010 |      |
| HQ541788 | NI |        | 2007 |      |
| GU131974 | MX |        | 2007 |      |
| GQ868646 | NI |        | 2007 |      |
| GQ868516 | MX |        | 2007 |      |
| FM986657 | MY |        | 2002 |      |
| FJ906962 | NI |        | 2005 |      |
| FJ898439 | MX |        | 2008 |      |
| FJ744704 | NI |        | 2001 |      |
| FJ410291 | NI |        |      | 2007 |
| FJ390390 | NI |        | 2007 |      |
| EU569699 | NI |        | 2007 |      |
| EU482762 | NI |        | 2005 |      |
| EU482672 | VN |        | 2006 |      |
| DQ518635 | MY |        | 2003 |      |
| JF968008 | ID |        | 2010 |      |
| JF804036 | PR |        | 2007 |      |
| GU211743 | VN |        | 2003 |      |
| GQ252676 | LK |        | 2003 |      |
| FM210241 | VN |        | 2004 |      |
| FM210221 | VN |        | 2003 |      |
| EU781135 | PR |        | 2005 |      |

|          |    |      |
|----------|----|------|
| EU687245 | PR | 2005 |
| EU687217 | PR | 2005 |
| EU687216 | PR | 2005 |
| EU677146 | PR | 2004 |
| EU596491 | PR | 2007 |
| EU596490 | PR | 2007 |
| EU596488 | PR | 2007 |
| EU482726 | PR | 2006 |
| EU482723 | PR | 2002 |
| EU482551 | PR | 2006 |
| EU482548 | PR | 2006 |
| EU482546 | PR | 1998 |
| EU448431 | ID | 2006 |
| DQ518642 | VN | 2004 |
| DQ448236 | IN | 2001 |
| AM746222 | SA | 2004 |
| AM746221 | SA | 2004 |
| JN030325 | SG | 2010 |
| JF968046 | PH | 2010 |
| JF967967 | ID | 2008 |
| HM488257 | GU | 2001 |
| GQ357793 | SG | 2008 |
| FJ898461 | BZ | 2002 |
| FJ196853 | CN | 2003 |
| EU482688 | NI | 2006 |
| EU482640 | VN | 2006 |
| EU448425 | ID | 2007 |
| EU179858 | BN | 2005 |
| EU179857 | BN | 2005 |
| DQ518643 | PH | 1994 |
| DQ518636 | MY | 2004 |
| DQ518633 | PH | 2005 |
| JX402215 | PR | 2010 |
| JX402214 | PR | 2010 |
| JQ013409 | PR | 2007 |
| JQ013408 | PR | 2007 |
| JN544396 | SG | 2011 |
| JN544395 | SG | 2011 |
| JN544394 | SG | 2011 |
| JN376788 | VN | 2005 |
| JF968022 | ID | 2010 |
| JF967963 | ID | 2008 |
| EU482720 | PR | 2006 |
| EU482719 | PR | 2006 |
| EU482556 | PR | 2005 |
| EU482552 | PR | 2006 |
| EU482549 | PR | 2006 |
| DQ448233 | IN | 2001 |
| DQ448231 | IN | 2001 |
| JX093609 | VN | 2011 |
| JQ403524 | TW | 2010 |
| JN544388 | SG | 2011 |
| JN380861 | SG | 2010 |
| JN196612 | SG | 2009 |
| JF968015 | ID | 2010 |
| JF968006 | ID | 2010 |

|          |    |        |      |      |
|----------|----|--------|------|------|
| JF967996 | PH |        | 2009 |      |
| JF967977 | ID |        | 2009 |      |
| JF967970 | ID |        | 2008 |      |
| HQ999999 | GT |        | 2009 |      |
| HQ705624 | NI |        | 2009 |      |
| HQ541805 | NI |        | 2005 |      |
| GU586123 | HN |        | 2007 |      |
| GQ868515 | MX |        | 2007 |      |
| EU448426 | PH |        | 2007 |      |
| EU069587 | SG |        | 2003 |      |
| EU069581 | SG |        | 2005 |      |
| JN030345 | SG |        | 2010 |      |
| JF968007 | ID |        | 2010 |      |
| JF804034 | JM |        | 2008 |      |
| GQ252677 | LK |        | 2004 |      |
| GQ199892 | JM |        | 2007 |      |
| FM986654 | MY |        | 1997 |      |
| FJ850107 | VE | Aragua |      | 2008 |
| FJ538913 | IN |        | 1997 |      |
| FJ538905 | IN |        | 2004 |      |
| EU482666 | VN |        | 2006 |      |
| EU045312 | PY |        | 2005 |      |
| JQ896295 | IE |        | 2011 |      |
| JN544393 | SG |        | 2011 |      |
| JN544392 | SG |        | 2011 |      |
| JN544387 | SG |        | 2011 |      |
| JN544386 | SG |        | 2011 |      |
| JN544385 | SG |        | 2011 |      |
| JN544384 | SG |        | 2011 |      |
| JN544383 | SG |        | 2011 |      |
| JN544382 | SG |        | 2011 |      |
| JN380860 | SG |        | 2010 |      |
| JN030326 | SG |        | 2010 |      |
| JF968016 | ID |        | 2010 |      |
| JF967964 | ID |        | 2008 |      |
| GU586122 | HN |        | 2007 |      |
| GQ357795 | SG |        | 2003 |      |
| EU179859 | BN |        | 2006 |      |
| EU069576 | SG |        | 2005 |      |
| JF968043 | VC |        | 2010 |      |
| FJ898467 | VE | Aragua |      | 2005 |
| JN851126 | SG |        | 2005 |      |
| JN851125 | SG |        | 2005 |      |
| JN851124 | SG |        | 2005 |      |
| JN544399 | SG |        | 2011 |      |
| JN544390 | SG |        | 2011 |      |
| JN544389 | SG |        | 2011 |      |
| JN196611 | SG |        | 2009 |      |
| JN036376 | BD |        | 2008 |      |
| JF968024 | ID |        | 2010 |      |
| JF968014 | ID |        | 2010 |      |
| JF968012 | MY |        | 2010 |      |
| GU908496 | VN |        | 2009 |      |
| GQ357796 | SG |        | 2003 |      |
| GQ357788 | SG |        | 2000 |      |
| GQ357783 | SG |        | 2005 |      |

|          |    |           |      |      |
|----------|----|-----------|------|------|
| GQ357776 | SG |           | 2001 |      |
| GQ357775 | SG |           | 2004 |      |
| GQ357773 | SG |           | 2004 |      |
| GQ357771 | SG |           | 2003 |      |
| GQ357770 | SG |           | 2003 |      |
| FM986659 | MY |           | 2002 |      |
| FJ196854 | CN |           | 1993 |      |
| EU448422 | IN |           | 2004 |      |
| EU448418 | PH |           | 2003 |      |
| EU081179 | SG |           | 2005 |      |
| EU081178 | SG |           | 2005 |      |
| EU081177 | SG |           | 2005 |      |
| EU069589 | SG |           | 2003 |      |
| EU069588 | SG |           | 2003 |      |
| EU069586 | SG |           | 2003 |      |
| EU069583 | SG |           | 2000 |      |
| EU069579 | SG |           | 2004 |      |
| DQ518637 | ID |           | 2005 |      |
| JN036379 | BD |           | 2006 |      |
| JN036378 | BD |           | 2007 |      |
| JN036374 | BD |           | 2009 |      |
| JN036372 | BD |           | 2009 |      |
| JN030333 | SG |           | 2010 |      |
| JN030328 | SG |           | 2010 |      |
| JF804033 | IN |           | 2006 |      |
| HQ332187 | VE |           | 2007 |      |
| HQ332185 | VE |           | 2007 |      |
| GQ868554 | CO | Santander |      | 2004 |
| FJ898454 | IN |           | 2006 |      |
| FJ807640 | IN |           | 1994 |      |
| FJ639734 | VE | Aragua    |      | 2003 |
| FJ639732 | VE | Aragua    |      | 2005 |
| EU482662 | VN |           | 2006 |      |
| EU482648 | VN |           | 2006 |      |
| EU482607 | VE | Aragua    |      | 2007 |
| EU448423 | BD |           | 2005 |      |
| EU448420 | VN |           | 2006 |      |
| DQ518639 | VN |           | 2005 |      |
| JN851130 | SG |           | 2005 |      |
| JN851128 | SG |           | 2006 |      |
| JN544391 | SG |           | 2011 |      |
| JN380816 | SG |           | 2009 |      |
| JN196568 | SG |           | 2009 |      |
| JN030327 | SG |           | 2009 |      |
| JF968035 | MY |           | 2010 |      |
| JF968002 | ID |           | 2009 |      |
| JF967976 | ID |           | 2009 |      |
| JF967975 | ID |           | 2009 |      |
| GQ357794 | SG |           | 2003 |      |
| GQ357790 | SG |           | 2007 |      |
| GQ357787 | SG |           | 2003 |      |
| GQ357785 | SG |           | 2003 |      |
| FM986660 | MY |           | 2002 |      |
| EU448430 | ID |           | 2007 |      |
| EU069592 | SG |           | 2003 |      |
| EU069584 | SG |           | 2002 |      |

Sheet1

|          |    |           |      |      |
|----------|----|-----------|------|------|
| EU069580 | SG |           | 2003 |      |
| EU069577 | SG |           | 2004 |      |
| EU069575 | SG |           | 2003 |      |
| EU069573 | SG |           | 2003 |      |
| EU069572 | SG |           | 2002 |      |
| JN030334 | SG |           | 2010 |      |
| JN030331 | SG |           | 2010 |      |
| JN030330 | SG |           | 2010 |      |
| JN030329 | SG |           | 2010 |      |
| HQ332190 | VE |           | 2007 |      |
| HQ332188 | VE |           | 2007 |      |
| HQ332184 | VE |           | 2006 |      |
| GQ868557 | CO | Santander |      | 2005 |
| GQ868556 | CO | Santander |      | 2005 |
| GQ868555 | CO | Santander |      | 2005 |
| FJ850108 | VE | Aragua    |      | 2008 |
| FJ850106 | VE | Aragua    |      | 2008 |
| EU482660 | VN |           | 2006 |      |
| EU482608 | VE | Aragua    |      | 2007 |
| EU482606 | VE | Aragua    |      | 2007 |
| EU482604 | VE | Aragua    |      | 2007 |
| EU045313 | PY |           | 2005 |      |
| DQ448237 | IN |           | 2001 |      |
| DQ448234 | IN |           | 2001 |      |
| JN851123 | SG |           | 2004 |      |
| JN036373 | BD |           | 2009 |      |
| JN030207 | SG |           | 2008 |      |
| JN030200 | SG |           | 2008 |      |
| JN030199 | SG |           | 2008 |      |
| JN022603 | SG |           | 2008 |      |
| JF968023 | ID |           | 2010 |      |
| JF968009 | ID |           | 2010 |      |
| JF968003 | ID |           | 2010 |      |
| JF968000 | ID |           | 2009 |      |
| GU370051 | SG |           | 2008 |      |
| GQ357792 | SG |           | 2002 |      |
| GQ357791 | SG |           | 2007 |      |
| GQ357784 | SG |           | 2005 |      |
| GQ357781 | SG |           | 2008 |      |
| GQ357774 | SG |           | 2005 |      |
| GQ357768 | SG |           | 2008 |      |
| GQ357767 | SG |           | 2008 |      |
| GQ357714 | SG |           | 2008 |      |
| EU448427 | SG |           | 2007 |      |
| EU081180 | SG |           | 2005 |      |
| EU069574 | SG |           | 2005 |      |
| JN544397 | SG |           | 2010 |      |
| JN196614 | SG |           | 2010 |      |
| JN196613 | SG |           | 2010 |      |
| JN036377 | BD |           | 2008 |      |
| JN030340 | SG |           | 2010 |      |
| HQ332189 | VE |           | 2007 |      |
| HQ332186 | VE |           | 2007 |      |
| FJ850112 | VE | Caracas   |      | 2004 |
| FJ639733 | VE | Aragua    |      | 2005 |
| EU482605 | VE | Aragua    |      | 2007 |

|          |    |           |      |
|----------|----|-----------|------|
| EU482449 | VN |           | 2006 |
| EU448424 | BD |           | 2004 |
| DQ448235 | IN |           | 2001 |
| JN851122 | SG |           | 2008 |
| JN030238 | SG |           | 2008 |
| JN030232 | SG |           | 2008 |
| JN030210 | SG |           | 2008 |
| JN030209 | SG |           | 2008 |
| JN030208 | SG |           | 2008 |
| JF967962 | MY |           | 2008 |
| GQ357824 | SG |           | 2008 |
| GQ357819 | SG |           | 2008 |
| GQ357816 | SG |           | 2008 |
| GQ357798 | SG |           | 2004 |
| GQ357797 | SG |           | 2004 |
| GQ357786 | SG |           | 2004 |
| GQ357764 | SG |           | 2008 |
| GQ357762 | SG |           | 2008 |
| GQ357759 | SG |           | 2008 |
| GQ357756 | SG |           | 2008 |
| GQ357724 | SG |           | 2008 |
| GQ357723 | SG |           | 2008 |
| GQ357721 | SG |           | 2008 |
| GQ357720 | SG |           | 2008 |
| GQ357718 | SG |           | 2008 |
| EU069591 | SG |           | 2004 |
| EU069590 | SG |           | 2004 |
| AB545874 | JP |           | 2008 |
| JN036380 | BD |           | 2006 |
| JN036375 | BD |           | 2008 |
| JF804030 | CR |           | 2003 |
| GU131947 | CO | Santander | 2007 |
| GQ868558 | CO | Santander | 2007 |
| FJ850105 | VE | Aragua    | 2007 |
| FJ538906 | IN |           | 2005 |
| JN851119 | SG |           | 2008 |
| JN851114 | SG |           | 2007 |
| JN851113 | SG |           | 2006 |
| JN380844 | SG |           | 2009 |
| JN196610 | SG |           | 2009 |
| JN196579 | SG |           | 2009 |
| JN196578 | SG |           | 2009 |
| JN196577 | SG |           | 2009 |
| JN196576 | SG |           | 2009 |
| JN196575 | SG |           | 2009 |
| JN196574 | SG |           | 2009 |
| JN030317 | SG |           | 2007 |
| JN030271 | SG |           | 2007 |
| JF968028 | MY |           | 2010 |
| JF968010 | ID |           | 2010 |
| JF967974 | ID |           | 2009 |
| GQ398267 | SG |           | 2007 |
| GQ398266 | SG |           | 2007 |
| GQ398265 | SG |           | 2008 |
| GQ357828 | SG |           | 2007 |
| GQ357810 | SG |           | 2008 |

Sheet1

|          |    |          |      |      |
|----------|----|----------|------|------|
| GQ357804 | SG |          | 2007 |      |
| GQ357800 | SG |          | 2007 |      |
| GQ357799 | SG |          | 2007 |      |
| GQ357782 | SG |          | 2007 |      |
| GQ357717 | SG |          | 2008 |      |
| GQ357711 | SG |          | 2008 |      |
| EU448429 | SG |          | 2007 |      |
| JN819407 | VE | Merida   |      | 2007 |
| JN030339 | SG |          | 2010 |      |
| JN030338 | SG |          | 2010 |      |
| JN030337 | SG |          | 2010 |      |
| JN030336 | SG |          | 2010 |      |
| JN030335 | SG |          | 2010 |      |
| JN030332 | SG |          | 2010 |      |
| JF967992 | IN |          | 2009 |      |
| GQ868641 | VE | Aragua   |      | 2007 |
| EU854294 | CO | Guaviare |      | 2005 |
| JN851117 | SG |          | 2007 |      |
| JN851120 | SG |          | 2007 |      |
| JN851116 | SG |          | 2007 |      |
| JN380841 | SG |          | 2009 |      |
| JN380830 | SG |          | 2009 |      |
| JN030274 | SG |          | 2007 |      |
| JN030273 | SG |          | 2007 |      |
| JN030247 | SG |          | 2009 |      |
| JN030234 | SG |          | 2010 |      |
| JN030216 | SG |          | 2008 |      |
| JN030213 | SG |          | 2009 |      |
| JN030206 | SG |          | 2008 |      |
| JN030201 | SG |          | 2008 |      |
| JN022602 | SG |          | 2007 |      |
| JN009091 | CN |          | 2010 |      |
| JF968050 | ID |          | 2010 |      |
| JF968031 | ID |          | 2010 |      |
| JF967981 | ID |          | 2009 |      |
| JF967960 | MY |          | 2008 |      |
| JF967954 | ID |          | 2008 |      |
| GU370050 | SG |          | 2007 |      |
| GQ357829 | SG |          | 2007 |      |
| GQ357825 | SG |          | 2007 |      |
| GQ357778 | SG |          | 2007 |      |
| GQ357763 | SG |          | 2008 |      |
| GQ357754 | SG |          | 2008 |      |
| GQ357751 | SG |          | 2008 |      |
| GQ357750 | SG |          | 2008 |      |
| GQ357749 | SG |          | 2008 |      |
| GQ357748 | SG |          | 2008 |      |
| GQ357747 | SG |          | 2008 |      |
| GQ357746 | SG |          | 2008 |      |
| GQ357744 | SG |          | 2008 |      |
| GQ357743 | SG |          | 2008 |      |
| GQ357742 | SG |          | 2008 |      |
| GQ357741 | SG |          | 2008 |      |
| GQ357740 | SG |          | 2008 |      |
| GQ357739 | SG |          | 2007 |      |
| GQ357738 | SG |          | 2007 |      |

|          |    |          |      |
|----------|----|----------|------|
| GQ357737 | SG |          | 2007 |
| GQ357736 | SG |          | 2006 |
| GQ357735 | SG |          | 2007 |
| GQ357734 | SG |          | 2007 |
| GQ357733 | SG |          | 2007 |
| GQ357732 | SG |          | 2007 |
| GQ357731 | SG |          | 2007 |
| GQ357730 | SG |          | 2007 |
| GQ357729 | SG |          | 2007 |
| GQ357728 | SG |          | 2007 |
| GQ357727 | SG |          | 2007 |
| GQ357726 | SG |          | 2007 |
| GQ357725 | SG |          | 2007 |
| GQ357716 | SG |          | 2007 |
| GQ357715 | SG |          | 2007 |
| FJ158608 | CN | Aug_2007 |      |
| EU448428 | VN |          | 2007 |
| EU069585 | SG |          | 2004 |
| JN030342 | SG |          | 2010 |
| JN030341 | SG |          | 2010 |
| FJ024475 | CO | Guaviare | 2005 |
| JN851129 | SG |          | 2006 |
| JN851127 | SG |          | 2004 |
| JN851118 | SG |          | 2008 |
| JN380849 | SG |          | 2010 |
| JN380848 | SG |          | 2010 |
| JN380843 | SG |          | 2009 |
| JN380822 | SG |          | 2009 |
| JN380820 | SG |          | 2009 |
| JN380818 | SG |          | 2009 |
| JN380813 | SG |          | 2009 |
| JN380812 | SG |          | 2009 |
| JN380811 | SG |          | 2009 |
| JN196592 | SG |          | 2009 |
| JN196591 | SG |          | 2009 |
| JN196590 | SG |          | 2009 |
| JN196586 | SG |          | 2009 |
| JN196572 | SG |          | 2009 |
| JN196571 | SG |          | 2009 |
| JN196570 | SG |          | 2009 |
| JN196569 | SG |          | 2009 |
| JN030305 | SG |          | 2010 |
| JN030296 | SG |          | 2007 |
| JN030269 | SG |          | 2008 |
| JN030242 | SG |          | 2010 |
| JN030241 | SG |          | 2010 |
| JN030240 | SG |          | 2010 |
| JN030239 | SG |          | 2010 |
| JN030218 | SG |          | 2008 |
| JN030217 | SG |          | 2008 |
| JN030212 | SG |          | 2008 |
| JN030211 | SG |          | 2008 |
| JN030205 | SG |          | 2008 |
| JN030204 | SG |          | 2008 |
| JN030203 | SG |          | 2008 |
| JN030202 | SG |          | 2008 |

|          |    |          |      |
|----------|----|----------|------|
| JN009092 | CN |          | 2010 |
| JF968032 | ID |          | 2010 |
| JF968025 | SG |          | 2010 |
| JF967957 | ID |          | 2008 |
| GQ357830 | SG |          | 2008 |
| GQ357827 | SG |          | 2007 |
| GQ357826 | SG |          | 2007 |
| GQ357823 | SG |          | 2007 |
| GQ357822 | SG |          | 2007 |
| GQ357821 | SG |          | 2007 |
| GQ357820 | SG |          | 2008 |
| GQ357817 | SG |          | 2008 |
| GQ357814 | SG |          | 2008 |
| GQ357777 | SG |          | 2007 |
| GQ357772 | SG |          | 2008 |
| GQ357766 | SG |          | 2008 |
| GQ357765 | SG |          | 2008 |
| GQ357761 | SG |          | 2008 |
| GQ357760 | SG |          | 2008 |
| GQ357758 | SG |          | 2008 |
| GQ357753 | SG |          | 2008 |
| GQ357752 | SG |          | 2008 |
| GQ357745 | SG |          | 2008 |
| EU069578 | SG |          | 2004 |
| JQ896296 | IE |          | 2011 |
| JN030285 | SG |          | 2008 |
| FJ024474 | CO | Guaviare | 2005 |
| FJ024473 | CO | Guaviare | 2005 |
| JN851115 | SG |          | 2007 |
| JN380850 | SG |          | 2010 |
| JN380823 | SG |          | 2009 |
| JN380821 | SG |          | 2009 |
| JN380819 | SG |          | 2009 |
| JN380817 | SG |          | 2009 |
| JN380815 | SG |          | 2009 |
| JN380814 | SG |          | 2009 |
| JN196609 | SG |          | 2010 |
| JN196600 | SG |          | 2009 |
| JN196599 | SG |          | 2009 |
| JN196573 | SG |          | 2009 |
| JN030320 | SG |          | 2010 |
| JN030312 | SG |          | 2010 |
| JN030308 | SG |          | 2010 |
| JN030304 | SG |          | 2010 |
| JN030303 | SG |          | 2010 |
| JN030302 | SG |          | 2010 |
| JN030292 | SG |          | 2008 |
| JN030268 | SG |          | 2009 |
| JN030261 | SG |          | 2009 |
| JN030260 | SG |          | 2009 |
| JN030237 | SG |          | 2008 |
| JN030236 | SG |          | 2010 |
| JN030235 | SG |          | 2008 |
| JN030233 | SG |          | 2008 |
| JN030230 | SG |          | 2008 |
| JN030215 | SG |          | 2008 |

|          |    |      |
|----------|----|------|
| JN030214 | SG | 2008 |
| JF967980 | ID | 2009 |
| JF967979 | ID | 2009 |
| JF967959 | ID | 2008 |
| HM067747 | SG | 2009 |
| HM067746 | SG | 2009 |
| GQ357818 | SG | 2008 |
| GQ357815 | SG | 2007 |
| GQ357807 | SG | 2008 |
| GQ357780 | SG | 2008 |
| GQ357779 | SG | 2007 |
| GQ357757 | SG | 2008 |
| GQ357755 | SG | 2008 |
| GQ357722 | SG | 2008 |
| GQ357719 | SG | 2008 |
| DQ518644 | TW | 1998 |
| DQ518634 | ID | 2004 |
| FJ807639 | IN | 1993 |
| FJ807636 | IN | 2005 |
| FJ807633 | IN | 2005 |
| JN544381 | SG | 2010 |
| JN544378 | SG | 2009 |
| JN544357 | SG | 2011 |
| JN544356 | SG | 2011 |
| JN544355 | SG | 2011 |
| JN544354 | SG | 2011 |
| JN544352 | SG | 2011 |
| JN380855 | SG | 2010 |
| JN380854 | SG | 2010 |
| JN380853 | SG | 2010 |
| JN380852 | SG | 2010 |
| JN380851 | SG | 2010 |
| JN380847 | SG | 2010 |
| JN380846 | SG | 2010 |
| JN380840 | SG | 2009 |
| JN380839 | SG | 2009 |
| JN380837 | SG | 2009 |
| JN380831 | SG | 2009 |
| JN380829 | SG | 2009 |
| JN380828 | SG | 2009 |
| JN380824 | SG | 2009 |
| JN196607 | SG | 2010 |
| JN196606 | SG | 2010 |
| JN196605 | SG | 2010 |
| JN196604 | SG | 2010 |
| JN196603 | SG | 2010 |
| JN196602 | SG | 2010 |
| JN196601 | SG | 2009 |
| JN196597 | SG | 2010 |
| JN196596 | SG | 2010 |
| JN196580 | SG | 2009 |
| JN030323 | SG | 2010 |
| JN030322 | SG | 2010 |
| JN030311 | SG | 2010 |
| JN030310 | SG | 2010 |
| JN030309 | SG | 2010 |

|          |    |      |
|----------|----|------|
| JN030298 | SG | 2010 |
| JN030297 | SG | 2010 |
| JN030295 | SG | 2010 |
| JN030294 | SG | 2010 |
| JN030290 | SG | 2009 |
| JN030289 | SG | 2010 |
| JN030288 | SG | 2010 |
| JN030284 | SG | 2010 |
| JN030283 | SG | 2010 |
| JN030281 | SG | 2008 |
| JN030279 | SG | 2008 |
| JN030278 | SG | 2008 |
| JN030277 | SG | 2008 |
| JN030276 | SG | 2010 |
| JN030275 | SG | 2010 |
| JN030272 | SG | 2010 |
| JN030263 | SG | 2010 |
| JN030262 | SG | 2010 |
| JN030231 | SG | 2010 |
| JN030229 | SG | 2010 |
| JN030228 | SG | 2010 |
| JN030227 | SG | 2010 |
| JN030226 | SG | 2010 |
| JN030225 | SG | 2010 |
| JN030224 | SG | 2010 |
| JN030223 | SG | 2010 |
| JN030222 | SG | 2010 |
| JN030221 | SG | 2010 |
| JN030220 | SG | 2010 |
| JN030219 | SG | 2010 |
| JF968049 | MY | 2010 |
| JF968034 | SG | 2010 |
| JF967965 | MY | 2008 |
| GQ357812 | SG | 2008 |
| GQ357809 | SG | 2008 |
| GQ357806 | SG | 2008 |
| GQ357805 | SG | 2008 |
| GQ357803 | SG | 2008 |
| GQ357769 | SG | 2008 |
| JN851121 | SG | 2008 |
| JN544380 | SG | 2009 |
| JN544379 | SG | 2011 |
| JN544376 | SG | 2011 |
| JN544374 | SG | 2011 |
| JN544373 | SG | 2011 |
| JN544372 | SG | 2011 |
| JN544371 | SG | 2011 |
| JN544370 | SG | 2011 |
| JN544359 | SG | 2011 |
| JN544353 | SG | 2011 |
| JN544351 | SG | 2011 |
| JN544350 | SG | 2011 |
| JN544349 | SG | 2011 |
| JN544348 | SG | 2011 |
| JN380862 | SG | 2010 |
| JN380857 | SG | 2010 |

|          |    |      |
|----------|----|------|
| JN380856 | SG | 2010 |
| JN380833 | SG | 2009 |
| JN196608 | SG | 2010 |
| JN196595 | SG | 2010 |
| JN196593 | SG | 2010 |
| JN196589 | SG | 2010 |
| JN196588 | SG | 2010 |
| JN196587 | SG | 2010 |
| JN196585 | SG | 2010 |
| JN196584 | SG | 2010 |
| JN196583 | SG | 2010 |
| JN196582 | SG | 2010 |
| JN196581 | SG | 2010 |
| JN030321 | SG | 2008 |
| JN030319 | SG | 2010 |
| JN030318 | SG | 2010 |
| JN030313 | SG | 2010 |
| JN030306 | SG | 2010 |
| JN030301 | SG | 2010 |
| JN030300 | SG | 2010 |
| JN030299 | SG | 2010 |
| JN030293 | SG | 2010 |
| JN030291 | SG | 2010 |
| JN030286 | SG | 2010 |
| JN030282 | SG | 2009 |
| JN030270 | SG | 2009 |
| JN030267 | SG | 2010 |
| JN030266 | SG | 2008 |
| JN030265 | SG | 2008 |
| JN030259 | SG | 2010 |
| JN030258 | SG | 2010 |
| JN030257 | SG | 2010 |
| JN030256 | SG | 2010 |
| JN030255 | SG | 2010 |
| JN030254 | SG | 2010 |
| JN030253 | SG | 2010 |
| JN030252 | SG | 2010 |
| JN030251 | SG | 2010 |
| JN030250 | SG | 2010 |
| JN030249 | SG | 2010 |
| JN030248 | SG | 2010 |
| JN030246 | SG | 2010 |
| JN030245 | SG | 2008 |
| JN030244 | SG | 2008 |
| JN030243 | SG | 2008 |
| JF968051 | SG | 2010 |
| JF967985 | ID | 2009 |
| JF967982 | ID | 2009 |
| HM067745 | SG | 2008 |
| GQ357813 | SG | 2008 |
| GQ357811 | SG | 2008 |
| GQ357808 | SG | 2008 |
| GQ357802 | SG | 2008 |
| GQ357713 | SG | 2008 |
| GQ357712 | SG | 2008 |
| FJ807634 | IN | 1994 |

|          |    |      |
|----------|----|------|
| JN544375 | SG | 2011 |
| JN544369 | SG | 2011 |
| JN544368 | SG | 2011 |
| JN544367 | SG | 2011 |
| JN544366 | SG | 2011 |
| JN544365 | SG | 2011 |
| JN544364 | SG | 2011 |
| JN544363 | SG | 2011 |
| JN544362 | SG | 2011 |
| JN544361 | SG | 2011 |
| JN544360 | SG | 2011 |
| JN544358 | SG | 2011 |
| JN380859 | SG | 2010 |
| JN380858 | SG | 2010 |
| JN380842 | SG | 2009 |
| JN380836 | SG | 2009 |
| JN380835 | SG | 2009 |
| JN380834 | SG | 2009 |
| JN380832 | SG | 2009 |
| JN380827 | SG | 2009 |
| JN380826 | SG | 2009 |
| JN380825 | SG | 2009 |
| JN196598 | SG | 2010 |
| JN196594 | SG | 2010 |
| JN030316 | SG | 2010 |
| JN030307 | SG | 2010 |
| JN030287 | SG | 2010 |
| JN030280 | SG | 2010 |
| JN030264 | SG | 2008 |
| GQ357801 | SG | 2008 |
| JN380845 | SG | 2009 |
| JN030315 | SG | 2010 |
| JN030314 | SG | 2010 |
| JF968044 | ID | 2010 |
| EU005258 | GH | 2005 |
| JN030324 | SG | 2010 |
| FJ807638 | IN | 1996 |
| FJ538910 | IN | 1964 |
| FJ538928 | IN | 1960 |
| FJ538915 | IN | 1967 |
| DQ448238 | IN | 2001 |
| FJ538927 | IN | 1957 |
| FJ538918 | IN | 1971 |
| FJ538917 | IN | 1971 |
| FJ538916 | IN | 1971 |
| FJ538926 | IN | 1956 |
| FJ538914 | IN | 1963 |
| HM582106 | WS | 1972 |
| FJ538921 | IN | 1980 |
| HM582117 | TO | 1974 |
| HM582116 | TO | 1974 |
| HM582114 | TO | 1974 |
| HM582113 | TO | 1974 |
| HM582112 | TO | 1974 |
| HM582111 | TO | 1974 |
| HM582109 | TA | 1971 |

|          |    |    |      |
|----------|----|----|------|
| HM582108 | TA |    | 1972 |
| HM582107 | WS |    | 1972 |
| HM582105 | WS |    | 1972 |
| HM582104 | WS |    | 1972 |
| HM582100 | FJ |    | 1971 |
| HM582099 | FJ |    | 1971 |
| HM582115 | TO |    | 1974 |
| HM582102 | NC |    | 1971 |
| HM582101 | FJ |    | 1971 |
| GQ868590 | MX |    | 1992 |
| FJ538908 | IN |    | 1964 |
| FJ538907 | IN |    | 1964 |
| HM582110 | TA |    | 1973 |
| HM582103 | NC |    | 1972 |
| GQ868600 | PR |    | 1969 |
| GQ398257 | ID |    | 1977 |
| FJ538909 | IN |    | 1964 |
| EU056811 | PE |    | 1995 |
| FJ538919 | IN |    | 1971 |
| EU056812 | PR |    | 1977 |
| DQ917243 | PR |    | 1977 |
| DQ917242 | PE |    | 1995 |
| FJ807635 | IN |    | 2005 |
| GQ868592 | CO |    | 1986 |
| FJ898449 | HN |    | 1984 |
| FJ467493 | MY |    | 2008 |
| EF105379 | MY |    | 1970 |
| EF105387 | NG |    | 1966 |
| EU003591 | NG |    | 1966 |
| EF105385 | SN |    | 1974 |
| EF105388 | NG |    | 1966 |
| EF105386 | BF |    | 1980 |
| DQ917247 | BF |    | 1980 |
| EF105381 | CI |    | 1980 |
| DQ917244 | CI |    | 1980 |
| EF105382 | BF |    | 1980 |
| DQ917246 | BF |    | 1980 |
| HQ012533 | BR | RJ | 1990 |
| HQ012538 | BR | RJ | 1990 |
| HQ012534 | BR | RJ | 1991 |
| HQ012510 | BR | RJ | 1995 |
| HQ012511 | BR | RJ | 1995 |
| HQ012512 | BR | RJ | 1996 |
| HQ012516 | BR | RJ | 1998 |
| HQ012536 | BR | RJ | 1998 |
| HQ012517 | BR | RJ | 1999 |
| HQ012537 | BR | RJ | 1999 |
| HQ012518 | BR | RJ | 2000 |
| HQ012519 | BR | RJ | 2000 |
| HQ012520 | BR | RJ | 2001 |
| HQ012521 | BR | RJ | 2001 |
| HQ012522 | BR | RJ | 2002 |
| HQ012525 | BR | RJ | 2007 |
| HQ012526 | BR | RJ | 2007 |
| HQ012527 | BR | RJ | 2008 |
| HQ012528 | BR | RJ | 2008 |

## Sheet1

|          |    |          |      |
|----------|----|----------|------|
| HQ026763 | BR | RJ       | 2008 |
| HQ012531 | BR | RJ       | 2010 |
| HQ012532 | BR | RJ       | 2010 |
| GQ368158 | BR | RJ       | 1998 |
| GQ368159 | BR | RJ       | 1998 |
| GQ368160 | BR | RJ       | 1998 |
| GQ368173 | BR | RJ       | 1998 |
| GQ368174 | BR | RJ       | 1998 |
| GQ368161 | BR | RJ       | 2007 |
| GQ368162 | BR | RJ       | 2007 |
| GQ368163 | BR | RJ       | 2007 |
| GQ368164 | BR | RJ       | 2007 |
| GQ368165 | BR | RJ       | 2008 |
| GQ368166 | BR | RJ       | 2008 |
| GQ368167 | BR | RJ       | 2008 |
| GQ368168 | BR | RJ       | 2008 |
| GQ368169 | BR | RJ       | 2008 |
| GQ368170 | BR | RJ       | 2008 |
| GQ368171 | BR | RJ       | 2008 |
| GQ368172 | BR | RJ       | 2008 |
| GQ368175 | BR | RJ       | 2008 |
| GQ368176 | BR | RJ       | 2008 |
| JQ710658 | BR | RJ       | 2010 |
| JQ710657 | BR | RJ       | 2011 |
| HQ012523 | BR | ES       | 2002 |
| HQ012524 | BR | ES       | 2003 |
| HQ012530 | BR | ES       | 2009 |
| GQ868549 | BR | SP       | 2008 |
| GQ868550 | BR | SP       | 2008 |
| GQ868551 | BR | SP       | 2008 |
| GU131864 | BR | SP       | 2008 |
| GU131879 | BR | SP       | 2008 |
| GU131880 | BR | SP       | 2008 |
| GU131881 | BR | SP       | 2008 |
| GU131882 | BR | SP       | 2008 |
| GU131883 | BR | SP       | 2008 |
| GU131884 | BR | SP       | 2008 |
| GU131885 | BR | SP       | 2008 |
| HM181971 | BR | SP       | 2008 |
| GQ330472 | BR | SP       | 2009 |
| HQ012508 | BR | BA       | 1991 |
| HQ012509 | BR | CE       | 1994 |
| HQ012535 | BR | CE       | 1994 |
| HQ012513 | BR | BA       | 1996 |
| HQ012514 | BR | RN       | 1997 |
| HQ012515 | BR | RN       | 1997 |
| HQ012529 | BR | BA       | 2009 |
| JN819419 | BR | Northern | 2000 |
| FJ850072 | BR | Northern | 2000 |
| FJ850074 | BR | Northern | 2001 |
| FJ850076 | BR | Northern | 2002 |
| FJ850078 | BR | Northern | 2003 |
| GQ868640 | BR | Northern | 2003 |
| FJ850082 | BR | Northern | 2004 |
| FJ850085 | BR | Northern | 2005 |
| FJ850088 | BR | Northern | 2006 |

## Sheet1

|          |    |          |      |
|----------|----|----------|------|
| FJ850091 | BR | Northern | 2007 |
| GQ199890 | BR | Northern | 2008 |
| AY484622 | AN | Curacao  | 1996 |
| AY484658 | AN | Curacao  | 1993 |
| AY484619 | AW |          | 1996 |
| AY484648 | BB |          | 1987 |
| AY484620 | BB |          | 1998 |
| AY484650 | BB |          | 1988 |
| AY484638 | BS |          | 1998 |
| AY484624 | DM |          | 1995 |
| AY484627 | DM |          | 1995 |
| AY484656 | DM |          | 1995 |
| AY484625 | DO |          | 1984 |
| AY484626 | DO |          | 1990 |
| AY484629 | GD |          | 1999 |
| AY484616 | LC |          | 1999 |
| AY484617 | LC |          | 1999 |
| AY484621 | LC |          | 1999 |
| AY484631 | LC |          | 1999 |
| AY484666 | SV |          | 1987 |
| AY484615 | TT |          | 1997 |
| AY484618 | TT |          | 1997 |
| AY484632 | TT |          | 2000 |
| AY484633 | TT |          | 1997 |
| AY484639 | TT |          | 1986 |
| AY484640 | TT |          | 1987 |
| AY484641 | TT |          | 1988 |
| AY484643 | TT |          | 1986 |
| AY484645 | TT |          | 1989 |
| AY484646 | TT |          | 1996 |
| AY484647 | TT |          | 1986 |
| AY484653 | TT |          | 2000 |
| AY484657 | TT |          | 1996 |
| AY484659 | TT |          | 1986 |
| AY484667 | TT |          | 1981 |
| AY484623 | VC |          | 1998 |
| AY484628 | VC |          | 1998 |
| AY484630 | VC |          | 1998 |
| AY484636 | VC |          | 1998 |
| AY484613 | SR |          | 1993 |
| AY484612 | SR |          | 1999 |
| AY484610 | SR |          | 1993 |
| AY484609 | SR |          | 1993 |
| AY484614 | SR |          | 1999 |
| AY484634 | SR |          | 1986 |
| AY484635 | SR |          | 1986 |
| AY484637 | SR |          | 1986 |
| AY484660 | SR |          | 1999 |
| AY484654 | SR |          | 1993 |
| AY484652 | SR |          | 1986 |
| AY484642 | GY |          | 2000 |
| AY484611 | BO |          | 1997 |
| AY484644 | CO |          | 1993 |
| AY484655 | VE |          | 1990 |
| AY484651 | EC |          | 2000 |
| AY484649 | EC |          | 2000 |

|          |    |      |
|----------|----|------|
| AY484661 | HN | 1986 |
| AY484662 | HN | 1991 |
| AY484663 | HN | 1991 |
| AY484664 | HN | 1991 |
| AY484665 | HN | 1991 |
| AY484605 | JM | 1983 |
| AY702041 | CU | 1997 |
| AY702042 | CU | 1997 |
| AY702043 | CU | 1997 |
| AY702044 | CU | 1997 |
| AY702045 | CU | 1997 |
| AY702046 | CU | 1997 |
| AY702047 | CU | 1997 |
| AY702048 | CU | 1997 |
| AY702049 | CU | 1997 |
| AY702050 | CU | 1997 |
| AY702051 | CU | 1997 |
| AY702052 | CU | 1997 |
| AY702053 | CU | 1997 |
| AY702054 | CU | 1997 |
| AY702055 | CU | 1997 |
| AY702056 | CU | 1997 |
| AY702057 | CU | 1997 |
| AY702058 | CU | 1997 |
| AY702059 | CU | 1997 |
| AY702060 | CU | 1997 |
| JX051785 | PE | 2010 |
| JX051792 | PE | 2010 |
| JX051791 | PE | 2010 |
| JX051790 | PE | 2010 |
| JX051788 | PE | 2010 |
| JX051789 | PE | 2010 |
| JX051787 | PE | 2010 |
| JX051796 | PE | 2011 |
| JX051786 | PE | 2010 |
| JX051793 | PE | 2011 |
| KC847996 | PE | 2012 |
| JX051795 | PE | 2011 |
| JX051794 | PE | 2011 |
| KC847995 | PE | 2012 |
| KC847991 | PE | 2011 |
| KC847994 | PE | 2012 |
| JX051784 | PE | 2009 |
| JX051783 | PE | 2009 |
| KC847992 | PE | 2012 |
| KC847993 | PE | 2012 |
| JX051797 | PE | 2011 |
| JX051798 | PE | 2011 |
| JX051777 | PE | 2007 |
| JX051778 | PE | 2007 |
| JX051779 | PE | 2007 |
| JX051780 | PE | 2008 |
| JX051782 | PE | 2009 |
| JX051781 | PE | 2009 |
| JX051772 | PE | 2002 |
| JX051771 | PE | 2002 |

## Sheet1

|          |    |      |
|----------|----|------|
| JX051773 | PE | 2002 |
| JX051774 | PE | 2002 |
| JX051775 | PE | 2002 |
| JX051776 | PE | 2002 |
| JX051769 | PE | 2001 |
| JX051770 | PE | 2001 |
| JX051767 | PE | 2000 |
| JX051768 | PE | 2000 |
| AF100466 | VE | 1990 |
| AY158329 | VE | 1990 |
| AF398106 | VE | 1999 |
| AF363078 | VE | 2008 |
| AF363092 | VE | 2008 |
| AF398108 | VE | 1999 |
| AF398113 | VE | 2000 |
| FJ182012 | CO | 2005 |
| JX051806 | BO | 2007 |
| JX051801 | BO | 2003 |
| JX051802 | BO | 2007 |
| JX051804 | BO | 2007 |
| JX051805 | BO | 2007 |
| JX051808 | BO | 2006 |
| JX051809 | BO | 2007 |
| JX051803 | BO | 2007 |
| JX051807 | BO | 2010 |
| JX051810 | BO | 2010 |
| JX051811 | BO | 2010 |
| JX051812 | PY | 2010 |
| JX051814 | PY | 2010 |
| JX051813 | PY | 2010 |
