# Supplementary material for: Spatiotemporal Dynamics of DENV-2 Asian-American Genotype Lineages in the Americas
Source: PubMed Central journal article supplement (PMC4045713; doi:10.1371/journal.pone.0098519), 2014-06-04
Supplement: pone.0098519.s002.pdf [file pone.0098519.s002.pdf]

Table S2. Posterior state probability distributions for the roots of major DENV-2 American lineages estimated using two different schemes of grouping of discrete geographic states.

| Group scheme         | MRCA                   | Posterior State Probability |          |      |      |      |    |
|----------------------|------------------------|-----------------------------|----------|------|------|------|----|
|                      |                        | GA                          | LA/SR/GY | SA1* | SA2* | CAM* | PE |
| 6 geographic states  | DENV-2 AS/AM (America) | 0.71                        | 0.29     | 0    | 0    | 0    | 0  |
|                      | Lineage I              | 0                           | 1        | 0    | 0    | 0    | 0  |
|                      | Lineage II             | 1                           | 0        | 0    | 0    | 0    | 0  |
|                      | Lineage III            | 0.39                        | 0.61     | 0    | 0    | 0    | 0  |
|                      | Lineage IV             | 0.99                        | 0.01     | 0    | 0    | 0    | 0  |
| 10 geographic states | DENV-2 AS/AM (America) | 0.69                        | 0.31     | 0    | 0    | 0    | 0  |
|                      | Lineage I              | 0                           | 1        | 0    | 0    | 0    | 0  |
|                      | Lineage II             | 1                           | 0        | 0    | 0    | 0    | 0  |
|                      | Lineage III            | 0.36                        | 0.63     | 0    | 0.01 | 0    | 0  |
|                      | Lineage IV             | 0.98                        | 0.02     | 0    | 0    | 0    | 0  |

For the analysis with 10 locations, the SA1 location was split in three (BR-SE, BR-N/NE and BO/PY), the SA2 location was split in two (VE and CO/EC), and the CAM location was split in two (NI and CAM/MX).
