# Supplementary material for: Spatiotemporal Dynamics of DENV-2 Asian-American Genotype Lineages in the Americas
Source: PubMed Central journal article supplement (PMC4045713; doi:10.1371/journal.pone.0098519), 2014-06-04
Supplement: pone.0098519.s003.pdf [file pone.0098519.s003.pdf]

**Table S3.** Viral migration rates between locations.

| From     | To   |          |      |      |      |      |
|----------|------|----------|------|------|------|------|
|          | GA   | LA/SR/GY | SA-1 | SA-2 | PE   | CEN  |
| GA       | -    | 7.26     | 1.14 | 1.52 | 0.03 | 0.21 |
| LA/SR/GY | 3.92 | -        | 1.41 | 2.18 | 0.05 | 0.75 |
| SA-1     | 0.08 | 0.07     | -    | 0.08 | 4.13 | 0.03 |
| SA-2     | 0.86 | 0.10     | 0.80 | -    | 2.68 | 1.12 |
| PE       | 0.05 | 0.02     | 0.13 | 0.24 | -    | 0.02 |
| CEN      | 0.06 | 0.05     | 0.03 | 1.11 | 0.04 | -    |
